# Supplementary material for: Effects of peripheral active warming and passive insulation on core body temperature during feline ovariohysterectomy: a multi-arm randomized clinical trial
Source: PubMed Central journal article supplement — J Feline Med Surg. 2023 Mar 3;25(3):1098612X231157585. doi: 10.1177/1098612X231157585 (PMC10812009; doi:10.1177/1098612x231157585), 2023-03-03
Supplement: sj-pdf-1-jfm-10.1177_1098612X231157585.pdf [file sj-pdf-1-jfm-10.1177_1098612X231157585.pdf]

# "Kitten Mitten" Pilot Survey

Please consider "kittens mittens" to be any type of insulation you provide to feline extremities during surgery.

\* Required

1. Currently, do you insulate feline legs/feet during surgery? Note this does NOT include items used for the feline core such as towels, forced air blankets (e.g. Bair Hugger), and electrically resistant conductive fabric blankets (e.g. HotDog). \*

Mark only one oval.

- Yes Skip to question 3
- No Skip to question 2
- Sometimes Skip to question 3

"Kitten Mittens"  
A

Please consider "kittens mittens" to be any type of insulation you provide to feline extremities during surgery.

2. What are your reasons for not using kitten mittens during surgery? Currently, our organization does not use them, but we want to learn why other organizations do or do not use them. Please select all that apply and/or write in your reasoning. \*

Check all that apply.

- They are an inefficient use of time/resources
- There is no evidence that they are effective
- This is my first time hearing about "kitten mittens"
- We do use "kitten mittens" but only after surgery is finished
- I have concerns about biosecurity/disease spread
- Other: \_\_\_\_\_

Skip to section 5 (Your survey is complete.)

"Kitten Mittens" 1

3. For the rest of the questions, please consider "kittens mittens" to be any type of insulation you provide to feline extremities during surgery. What are "kitten mittens" at your facility? \*

*Mark only one oval.*

- Only baby socks
- Only children's socks
- Only adult socks
- Only insulated socks (for cold weather/skiing)
- Only bubble wrap
- It varies (we use a bunch of different types)
- Other: \_\_\_\_\_

4. Are "kitten mittens" reused? \*

*Mark only one oval.*

- Yes, we use the same "kitten mittens" on every cat
- Yes, but we wash the "kitten mittens" between cats
- No, we dispose of the "kitten mittens" after each use
- Other: \_\_\_\_\_

5. Which cats receive "kitten mittens?" Check all that apply. \*

*Check all that apply.*

- Feline adult spay
- Feline pediatric spay
- Feline adult neuter
- Feline pediatric neuter
- Feline amputation/enucleation/surgical explore/dental surgeries
- Other: \_\_\_\_\_

6. Routinely, how many of the cat's feet do you cover with "kitten mittens?" \*

*Mark only one oval.*

- 1
- 2
- 3
- 4    *Skip to section 5 (Your survey is complete. )*

7. When do you put "kitten mittens" on the cats? \*

*Mark only one oval.*

- After induction
- Prior to shaving
- After shaving
- Prior to scrubbing
- After scrubbing
- Start of surgery
- When hypothermia is detected
- It varies (there is no specific protocol, or if there is one, it is not often followed)
- Other: \_\_\_\_\_

8. When do you take the "kitten mittens" off the cats? \*

*Mark only one oval.*

- End of Surgery
- Before extubation
- After extubation
- Just before the cat is moved out of recovery
- When normal temperature is achieved
- It varies (there is no specific protocol, or if there is one, it is not often followed)
- Other: \_\_\_\_\_

9. Is there anything else you would like to share about how you use "kitten mittens?"

---

---

---

---

---

10. Tell us the reasoning for why you use "kitten mittens." \*

---

---

---

---

---

11. Previously you noted you do not use "kitten mittens" on all four feline feet. Which feet do you routinely cover? Check all that apply

*Check all that apply.*

- Right front paw/limb
- Left front paw/limb
- Right hind paw/limb
- Left hind paw/limb

Your  
survey is  
complete.

Thank you for your participation in this survey! If you would like to learn more about this survey or our research, please contact Lauren MacDonald ([Imacdo@midwestern.edu](mailto:Imacdo@midwestern.edu)), the 2020-2021 shelter medicine intern at Midwestern University Animal Health Institute.

---

This content is neither created nor endorsed by Google.

Google Forms
